# Supplementary material for: Host–guest complexation of APP+ with cucurbit[7]uril. Theoretical and experimental studies on the supramolecular inhibition of its cytotoxicity on SERT
Source: Royal Society of Chemistry journal article supplement (doi:10.1039/d2nj01963a), 2022-01-01
Supplement: d2nj01963a1.pdf [file d2nj01963a1.pdf]

## Supporting Information (SI)

### **Host-guest complexation of APP+ with cucurbit[7]uril. Theoretical and experimental studies on the supramolecular inhibition of its cytotoxicity on SERT.**

Sebastián Almendras<sup>a</sup>, Ana María Zárate<sup>a</sup>, Luis Dinamarca-Villarroel<sup>a</sup>, Daniel Guerra<sup>b</sup>, Denis Fuentealba<sup>b</sup>, Jose M. Eltit<sup>c</sup>, Margarita E. Aliaga,<sup>b</sup> Angélica Fierro<sup>\*a</sup> and Edwin G. Pérez.<sup>\*a</sup>

---

[a] Dr. S. Almendras, Dr. A. M. Zárate, L. Dinamarca-Villarroel, Prof. A. Fierro, Prof. EG. Pérez.  
Department of Organic Chemistry, Faculty of Chemistry and Pharmacy, Pontificia Universidad Católica de Chile.  
Santiago 7820436, Chile.  
E-mail: eperezh@uc.cl

[b] Prof. D. Fuentealba, D. Guerra, Prof. M. E. Aliaga.  
Department of Physical Chemistry, Faculty of Chemistry and Pharmacy, Pontificia Universidad Católica de Chile.  
Santiago 7820436, Chile.

[c] J. M. Eltit. Department of Physiology and Biophysics, School of Medicine, Virginia Commonwealth University,  
Richmond, Virginia 23298, United States.

## Content

|                                                                                                                                                                                                                                                                                                     |   |
|-----------------------------------------------------------------------------------------------------------------------------------------------------------------------------------------------------------------------------------------------------------------------------------------------------|---|
| <b>Figure S1.</b> UV-Vis spectrophotometric host-guest titration of <b>AAP<sup>+</sup></b> (2 $\mu\text{M}$ ) with CB[7] in aqueous solution. ....                                                                                                                                                  | 2 |
| <b>Figure S2(A).</b> Fluorescence decay of <b>AAP<sup>+</sup></b> (1.6 $\mu\text{M}$ ) in aqueous solution (blue line). Excitation wavelength at 458 nm and emission wavelength at 512 nm. The instrument response function is also shown in the figure (red line). ....                            | 2 |
| <b>Figure S2(B).</b> Fluorescence decay of <b>AAP<sup>+</sup></b> (1.6 $\mu\text{M}$ ) in the presence of CB[7] (16.3 $\mu\text{M}$ ) (blue line). Excitation wavelength at 458 nm and emission wavelength at 512 nm. The instrument response function is also shown in the figure (red line). .... | 3 |
| <b>Figure S3.</b> Fluorescence decay of <b>AAP<sup>+</sup></b> (1.6 $\mu\text{M}$ ) in acetonitrile. Excitation wavelength at 458 nm and emission wavelength at 512 nm. The instrument response function is also shown in the figure (red line). ....                                               | 3 |
| <b>Figure S4.</b> Fluorescence decay of <b>AAP<sup>+</sup></b> (1.6 $\mu\text{M}$ ) in dichloromethane. Excitation wavelength at 458 nm and emission wavelength at 512 nm. The instrument response function is also shown in the figure (red line). ....                                            | 4 |
| <b>Figure S5.</b> ITC enthalpogram for the binding of <b>APP<sup>+</sup></b> with CB[7] at 25°C in 0.01 M Phosphate-buffered saline (PBS). ....                                                                                                                                                     | 4 |

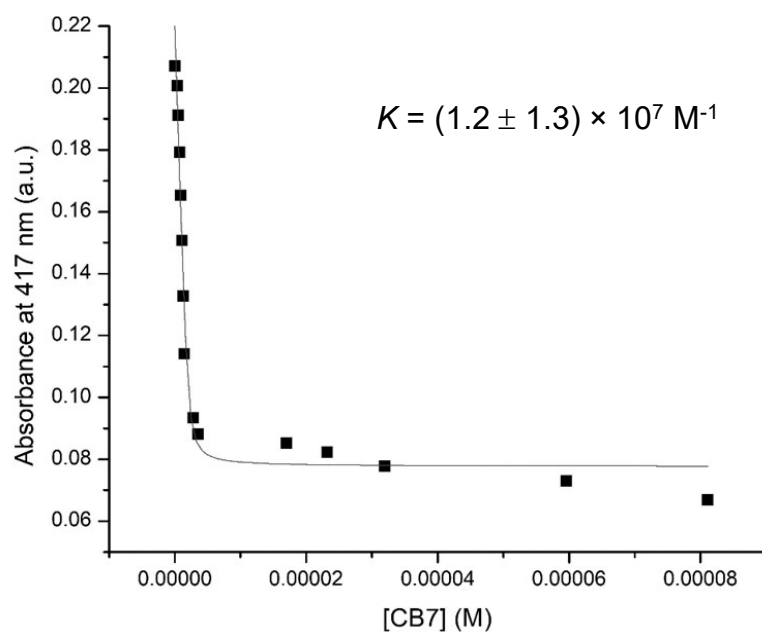

**Figure S1.** UV-Vis spectrophotometric host-guest titration of **AAP<sup>+</sup>** (2  $\mu$ M) with CB[7] in aqueous solution.

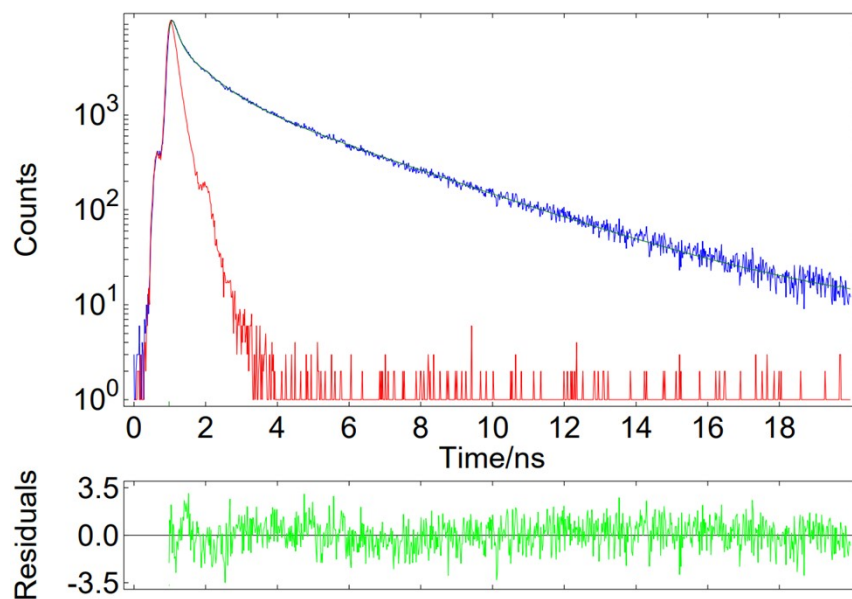

**Figure S2(A).** Fluorescence decay of **AAP<sup>+</sup>** (1.6  $\mu$ M) in aqueous solution (blue line). Excitation wavelength at 458 nm and emission wavelength at 512 nm. The instrument response function is also shown in the figure (red line).

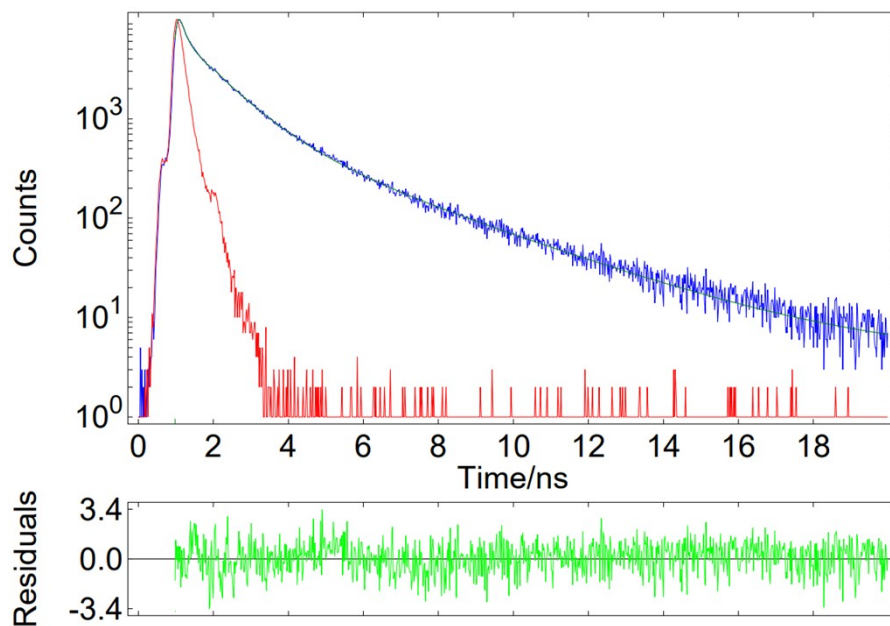

**Figure S2(B).** Fluorescence decay of **AAP<sup>+</sup>** (1.6  $\mu\text{M}$ ) in the presence of CB[7] (16.3  $\mu\text{M}$ ) (blue line). Excitation wavelength at 458 nm and emission wavelength at 512 nm. The instrument response function is also shown in the figure (red line).

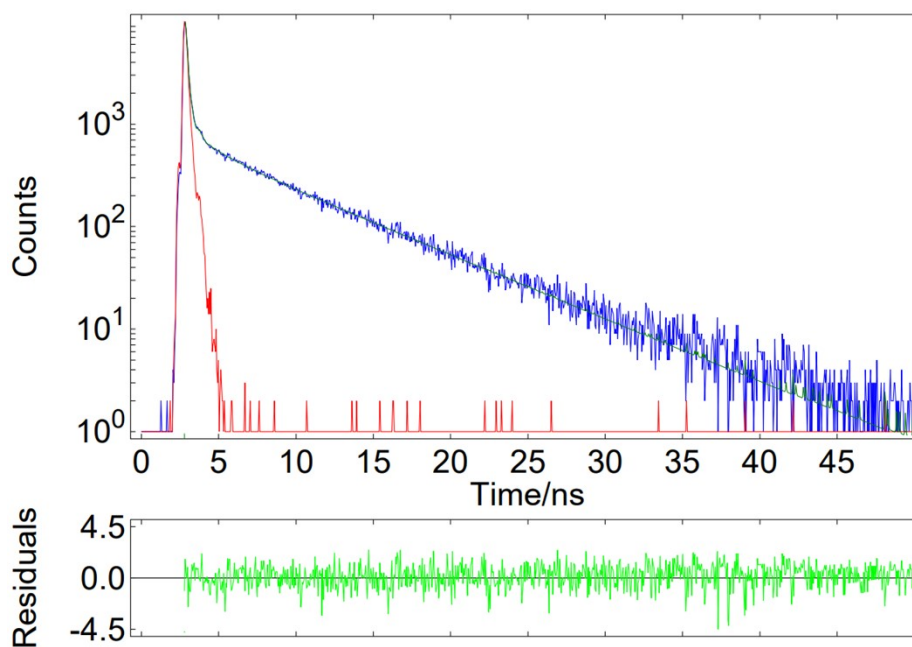

**Figure S3.** Fluorescence decay of **AAP<sup>+</sup>** (1.6  $\mu\text{M}$ ) in acetonitrile. Excitation wavelength at 458 nm and emission wavelength at 512 nm. The instrument response function is also shown in the figure (red line).

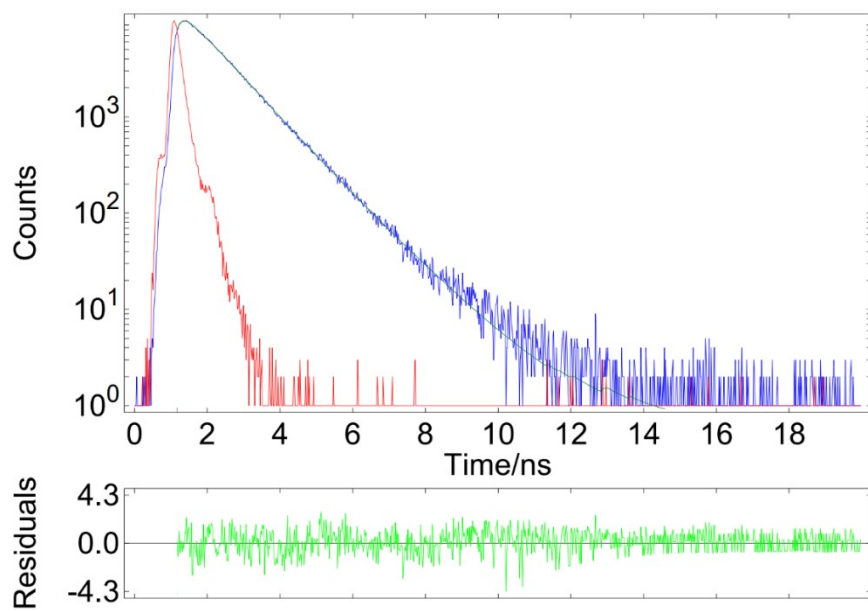

**Figure S4.** Fluorescence decay of **AAP<sup>+</sup>** (1.6  $\mu\text{M}$ ) in dichloromethane. Excitation wavelength at 458 nm and emission wavelength at 512 nm. The instrument response function is also shown in the figure (red line).

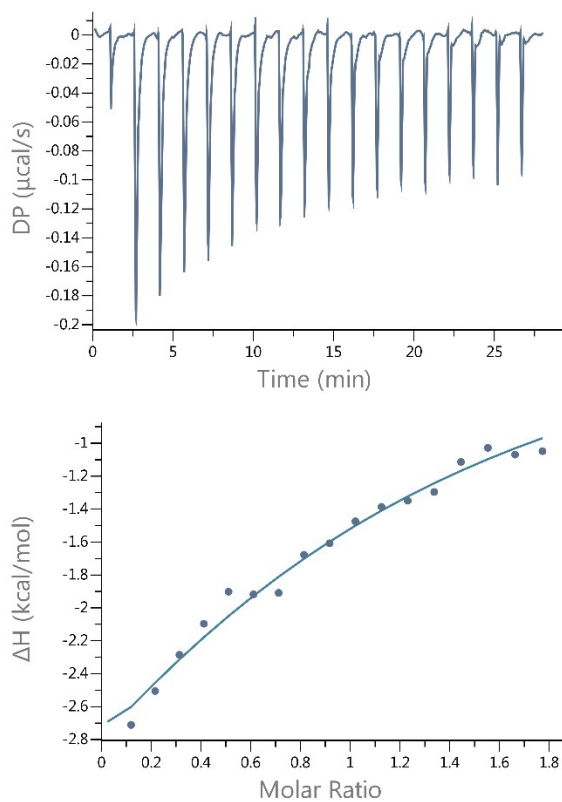

**Figure S5.** ITC enthalpogram for the binding of **APP<sup>+</sup>** with CB[7] at 25°C in 0.01 M Phosphate-buffered saline (PBS).
